1 **Phylogenomic and mitogenomic data can accelerate inventorying of tropical**  
2 **beetles during the current biodiversity crisis**

3

4

5 Michal Motyka<sup>#</sup>, Dominik Kusy<sup>#</sup>, Matej Bocek, Renata Bilkova & Ladislav Bocak\*  
6 Laboratory of Biodiversity and Molecular Evolution, Czech Advanced Technology  
7 Research Institute, Centre of Region Hana, Palacky University, Slechtitelu 27, 783 71  
8 Olomouc, Czech Republic

9 <sup>#</sup>The authors equally contributed to the project

10 \*corresponding author

11

12

13 **Abstract**

14 Conservation efforts must be evidence-based, so rapid and economically feasible  
15 methods should be used to quantify diversity and distribution patterns. We have  
16 attempted to overcome current impediments to the gathering of biodiversity data by using  
17 integrative phylogenomic and three mtDNA fragment analyses. As a model, we  
18 sequenced the Metriorrhynchini beetle fauna, sampled from ~700 localities in three  
19 continents. The species-rich dataset included ~6,500 terminals, >2,300 putative species,  
20 more than a half of them unknown to science. The phylogenomic backbone enabled the  
21 integrative delimitation of robustly defined natural units that will inform future research.  
22 Using constrained mtDNA analysis, we identified the spatial structure of  $\alpha$ -diversity, very  
23 high species-level endemism, a biodiversity hotspot in New Guinea, and high  
24 phylogenetic diversity in the Sundaland. We suggest that ~20 person months of focused  
25 field research and subsequent laboratory and bioinformatic workflow steps would  
26 substantially accelerate the inventorying of any hyperdiverse tropical group with several  
27 thousand species. The outcome would be a scaffold for the incorporation of further data.  
28 The database of sequences could set a benchmark for the spatiotemporal evaluation of  
29 biodiversity, would support evidence-based conservation planning, and would provide a  
30 robust framework for systematic, biogeographic, and evolutionary studies.

31

32

33

34

35

36

## 37 **Introduction**

38 The number of known insects surpasses that of all other terrestrial groups (Mora *et al.*,  
39 2011), and we need much more detailed information to fully understand their diversity.  
40 Currently, the available biodiversity data are far from complete, and the majority of insect  
41 species remain undescribed (Novotny *et al.*, 2006; Sriwathsan *et al.*, 2019). In addition,  
42 robust phylogenetic hypotheses are lacking for most lineages, and the genera and tribes  
43 are often artificial assemblages which are not relevant to evolutionary and biodiversity  
44 research. Therefore, we need to gather new information in order to advance our  
45 understanding of evolutionary and genetic relationships, and to build a phylogenetic  
46 scaffold for comprehensive taxonomic, biogeographic, and evolutionary studies that would  
47 be indispensable for biodiversity management.

48 Descriptive, morphology-based insect systematics is not keeping pace with the rapid  
49 loss and degradation of natural habitats (Theng *et al.*, 2020), and with the ongoing decline  
50 in insect abundance as a result of human activities and climate change (van Klink *et al.*,  
51 2020). To accelerate the cataloguing of biodiversity, it is vital to use innovative methods  
52 (Riedel *et al.*, 2013; Sriwathsan *et al.*, 2019; Yeo *et al.*, 2020; Sharkey *et al.*, 2021). DNA  
53 data are indisputably a valuable source for modern biodiversity research (Tautz *et al.*,  
54 2003; Hajibabaei *et al.* 2007). There are two principal sources of data: voucher-based  
55 DNA sequences typically produced by systematists (Riedel *et al.*, 2013; Yeo *et al.*, 2020;;  
56 Sharkey *et al.*, 2021), and DNA sequences produced by an ecosystem-based sequencing  
57 that does not associate individual samples with Linnean names (Andújar *et al.*, 2015;  
58 Sriwathsan *et al.*, 2019). It is the responsibility of systematic biologists to assemble the  
59 natural system, i.e., we need to reliably delimit genus- and tribe-level taxa, to make their  
60 ecological and distribution attributes informative. Then, a robust and stable natural  
61 classification will significantly facilitate detailed research into the spatial and temporal  
62 distribution of biodiversity (Morrison *et al.*, 2009; Thomson *et al.*, 2018). As an ultimate  
63 goal we should attempt to construct a complete tree of life, or at least its backbone, which  
64 is invaluable in aiding the selection of groups for more detailed analyses (Chesters, 2017;  
65 McKenna *et al.*, 2019). With a well-defined high-level classification, it is paramount to  
66 exploit all accessible data. We assume that voucher-based molecular phylogenies provide  
67 much-needed tools to researchers working on site-based biodiversity assessments  
68 (Andújar *et al.*, 2015; Sriwathsan *et al.*, 2019) and that, in turn, the data produced by  
69 environmental and ecosystem-focused sequencing contribute to building the tree-of-life  
70 (Arribas *et al.*, 2016; Bocak *et al.*, 2016).

71 We have used hyperdiverse tropical metriorrhynchine beetles (Coleoptera, Lycidae,  
72 Metriorrhynchini) as our model. This net-winged beetle tribe contains >1,500 recognised  
73 species, mostly found in the Old-World tropics (Fig. 1A), and their classification is

74 complicated by the complex taxonomic history (Bocak *et al.*, 2020). The phenetic plasticity  
75 of Metriorrhynchini is relatively high (Fig. 1B–D), but many distant species resemble each  
76 other due to convergent selection in Mullerian rings (Bocek *et al.*, 2019; Motyka *et al.*,  
77 2020, 2021). Therefore, unrelated taxa were often assumed to be closely related due to  
78 misleading morphological similarities. Although there are over 40 genera in the tribe,  
79 three-quarters of the species have been described in five ambiguously defined genera  
80 (*Xylobanus*, *Cautires*, *Trichalus*, *Metriorrhynchus*, and *Cladophorus*). Sometimes a single  
81 genus contains species from different subtribes (Bocak *et al.*, 2020). In this respect, the  
82 Metriorrhynchini is a typical species-rich tropical insect group without well-founded  
83 classification and the paucity and inaccuracy of available data (Letsch *et al.*, 2020). As a  
84 result, unlike vertebrates, these poorly known insect groups have not been considered for  
85 use in large-scale, integrative projects and data meta-analyses (Myers *et al.*, 2000; Holt *et*  
86 *al.*, 2013) and have contributed little to our understanding of global biodiversity patterns.

87 The principal objective of this study is to demonstrate how biodiversity information for  
88 a hyperdiverse tropical group can be rapidly expanded via targeted field research and  
89 large-scale sequencing. Our investigation comprised four distinct steps, aiming for a DNA-  
90 based evaluation of diversity and evolution. First, we assembled material from several  
91 hundred localities on three continents (Fig. 1, Tab. 1). Second, as hyperdiverse groups  
92 are difficult to tackle and the current classification is unreliable, we attempted to  
93 compartmentalise diversity using phylogenomics. We then produced a tree, using all  
94 available data, to estimate species limits, intraspecific genetic variability, and species  
95 ranges. Finally, the tree was pruned and used to estimate shallow phylogenetic  
96 relationships, total and regional  $\alpha$ -diversity, and endemism, and to define generic ranges  
97 and continental-scale range shifts. Our information and phylogenetic hypotheses can be a  
98 resource for higher-level phylogenetics, population genetics, phylogeographic studies,  
99 and biodiversity estimation. At the same time, we want to show how limited our  
100 taxonomical knowledge is and how this lack is hindering biodiversity research and  
101 management (Thompson *et al.*, 2018).

102  
103

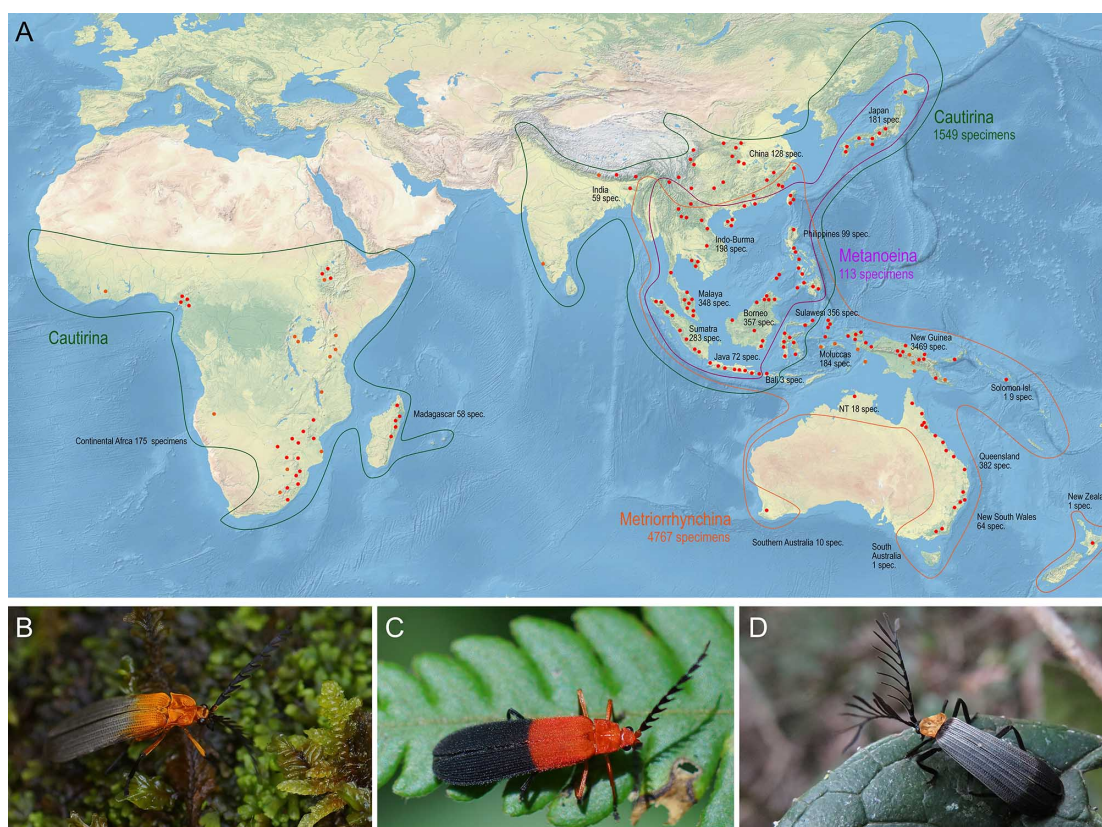

104  
105

106 Figure 1. A – Distribution of Metriorrhynchini with major sampled localities designated by red dots.  
107 The numbers of analysed specimens from individual regions are shown for regions and subtribes.  
108 B–D – General appearance of Metriorrhynchini.

109

110

111

## 112 Results

### 113 *Sampling of the Metriorrhynchini range*

114 In total, we monitored almost 800 localities, 696 of them with occurrences of the  
115 Metriorrhynchini (Tabs. 1, S1). The distribution of sampling sites was partly biased due to  
116 the large extent of the Metriorrhynchini range, limited time and funds, different goals of  
117 various expeditions, and logistic problems (inaccessible regions, legal obstacles). The  
118 densest sampling is available from the Sundaland and New Guinea, while India and the  
119 Afrotropical region are under-sampled.

120

121

122

123

124

125

126

127

128

129

130 Table 1. The numbers of sampled localities per region.  
131

| Area                  | Localities | Area               | Localities |
|-----------------------|------------|--------------------|------------|
| Australian region     | 347        | Palaearctic region | 79         |
| Australia             | 118        | China              | 51         |
| New Zealand           | 1          | Japan              | 28         |
| New Guinea            | 175        | Russian Far East   | 0          |
| New Britain & Ireland | 0          |                    |            |
| Solomon Isl.          | 4          |                    |            |
| Moluccas              | 15         | Oriental region    | 206        |
| Sulawesi              | 34         | Himalayas          | 0          |
|                       |            | S India & Ceylon   | 3          |
| Afrotropical Region   | 64         | E. India & Burma   | 12         |
| West Africa           | 1          | E. Indo-Burma      | 44         |
| Guinean Gulf          | 9          | Malay Peninsula    | 57         |
| Congo Basin           | 2          | Sumatra            | 23         |
| Sahel                 | 0          | Borneo             | 19         |
| Ethiopia & Somalia    | 6          | Java & Bali        | 15         |
| East African Highl.   | 10         | Philippines        | 33         |
| South Africa          | 25         |                    |            |
| Madagascar            | 11         | Total              | 696        |

132

133

#### 134 *Assembly of the phylogenomic tree*

135 The phylogenomic dataset contained 35 Metriorrhynchini terminals, seven outgroups, and  
136 ~4,200 orthologs ( $1.9\text{--}5.7 \times 10^6$  aligned positions; Tab. S5). The tree shown in Fig. 2A  
137 was produced using maximum likelihood (ML) analyses, whereas the coalescent method  
138 produced the topology shown in Fig. 2B; additional trees are shown in Figs. S1–S8. For  
139 details on the data sets' characteristics see Figs. S9–S12. Phylogenomic analyses  
140 resolved three subtribes (Metanoeina (Metriorrhynchina, Cautirina)), and five clades were  
141 regularly recovered within the Metriorrhynchina, i.e., the procautirines, leptotrichalines,  
142 trichalines, porrostomines, and cladophorines. Different settings (see Methods) produced  
143 slightly different topologies and shifted the positions of the leptotrichalines and  
144 procautirines (Fig. 3D). However, the monophyly of major subclades was not affected.  
145 The FcLM analysis favoured a deeper position for the leptotrichaline clade (61.2%; Figs.  
146 2C, S13). The position of the remaining terminals was stable across all analyses.

147

#### 148 *Constrained mitogenomics*

149 The mtDNA database contained >11,500 mtDNA fragments (5,935 *cox1*, 2,381 *rrnL*, and  
150 3,205 *nad5*) representing 6,429 terminals (2,930 aligned positions). Using these data, we  
151 inferred additional trees using the constrained positions of 35 terminals whose  
152 relationships were determined through phylogenomic analyses, and the free positions of  
153 the other ~6,400 terminals (Fig. S14). The units based on uncorrected pairwise distances  
154 represent molecular operational taxonomic units (mOTUs), considered to be putative  
155 species, or 'species' for short. We identified 37 mOTUs in the Metanoeina clade and 456



156 mOTUs in Cautirina. The major Metriorrhynchina clade (1,763 mOTUs) included  
 157 procautirines, leptotrichalines, trichalines, porrostomines, and cladophorines. In addition,  
 158 we identified several deeply rooted lineages, the kassemiines, and another five small  
 159 clades (89 mOTUs in total; Fig. S15), each of which comprised a limited number of  
 160 species. As phylogenomic data for these terminals are still lacking, their terminal positions  
 161 were determined based only on mtDNA data. The number of mOTUs does not include  
 162 ~50 mOTUs for which *cox1* was unavailable.  
 163

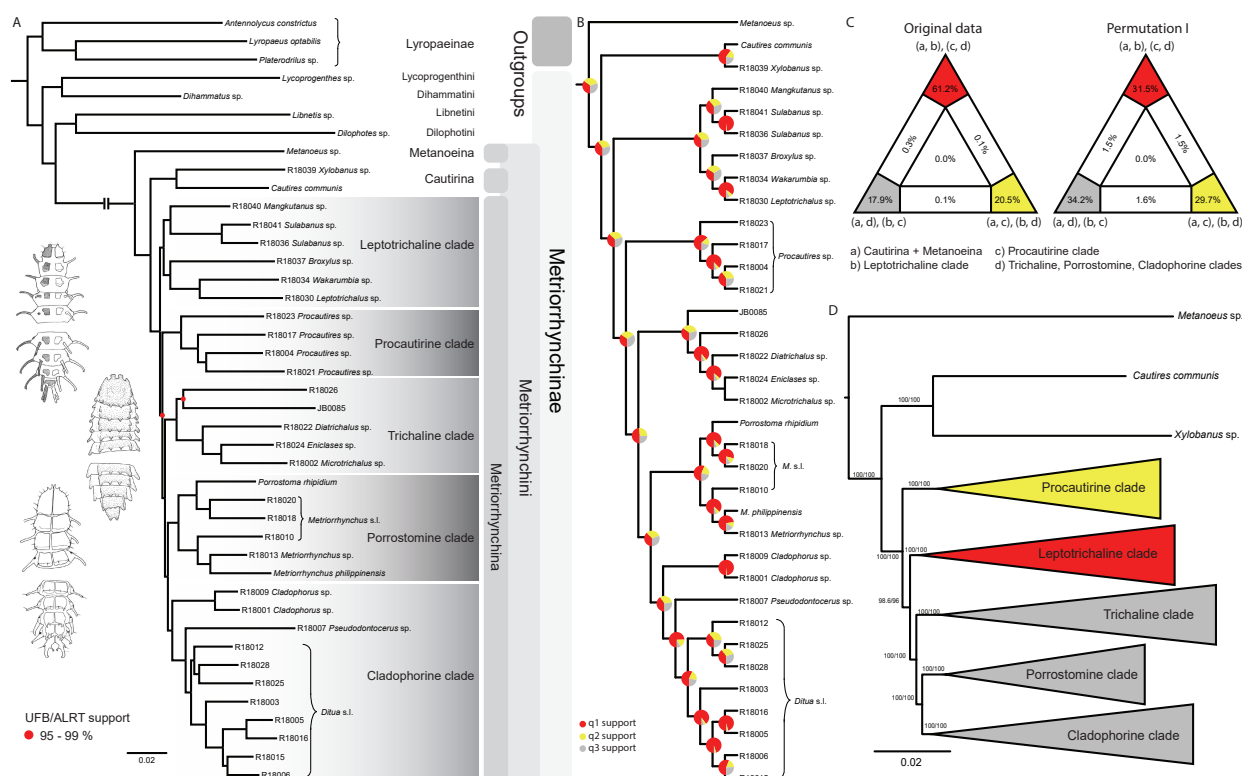

164  
 165  
 166  
 167 Figure 2. A – Phylogenetic relationships of Metriorrhynchinae based on the ML analyses of the  
 168 concatenated amino-acid sequence data of supermatrix F-1490-AA-Bacoca-decisive. Unmarked  
 169 branches are supported by 100/100 UFB/alrt; red circles depict lower phylogenetic branch support.  
 170 B – Phylogenetic relationships of Metriorrhynchini recovered by the coalescent phylogenetic  
 171 analysis with ASTRAL when analysing the full set of gene trees (4109 gene trees inferred at the  
 172 nucleotide level). Pie charts on branches show ASTRAL quartet support (quartet-based  
 173 frequencies of alternative quadripartition topologies around a given internode). Outgroups taxa are  
 174 not shown. C – Results of FcLM analyses for selected phylogenetic hypotheses applied at the  
 175 amino-acid sequence level (supermatrix F). D – Alternative phylogenetic relationships of  
 176 Metriorrhynchinae based on the ML analyses of the concatenated amino-acid sequence data of  
 177 supermatrix A-4109-AA. Numbers depict phylogenetic branch support values based on 5000  
 178 ultrafast bootstrap replicates.  
 179

180

181

### 182 *Pruned mitogenomic tree with and without constraints*

183 The dataset was subsequently pruned to a single terminal per mOTU (see below) and  
184 was analysed both with and without topological constraints (Figs. 3A, S15, S16).

185 Repeated runs with different starting seeds identified terminals with unstable positions  
186 (Figs. 3A–C). The major clades were generally stable, whereas small, deeply rooted  
187 clades were prone to ‘wandering’ around the tree, as were distinct singletons. The trees  
188 that resulted from each of the seed-specific 19 ML runs differed slightly; tree similarity  
189 was thus evaluated using the Robinson-Foulds index, with values ranging from 0.180  
190 (most similar) to 0.147 (most distant; Tab. S7).

191

### 192 *Tree congruence*

193 The degree of incongruence between selected topologies is shown in Fig. 3C–D. The  
194 unconstrained analysis of mitochondrial data yielded a topology with a high number of  
195 terminals that were recovered in positions incongruent with their morphology (Fig. 3D, E,  
196 S16). The same dataset, when analysed using the constrained position of 35 terminals  
197 (based on their relative relationships inferred by prior phylogenomic analyses), produced  
198 a topology with a much lower proportion of terminals in dubious positions (Fig. 3C, S15).  
199 The composition of the constituent clades is shown in Tab. S8; individual clades are  
200 characterised in the Supplementary Text.

201

### 202 *Alpha-diversity*

203 To investigate the total and regional  $\alpha$ -diversity of the Metriorrhynchini, we analysed a  
204 dataset comprising 5,935 of the 6,429 terminals for which the *cox1* mtDNA fragment was  
205 available (Fig. 3A; Tab. S3). We identified 2,345 mOTUs using a 2% distance threshold.  
206 We disregarded the presence of ~50 mOTUs (494 terminals) for which *cox1* was missing.  
207 The number of mOTUs based on the *cox1* analysis varied by threshold. For the  
208 Metriorrhynchini, we identified 1,848 and 2,356 mOTUs using thresholds of 5% and 2%,  
209 respectively (Fig. S17).

210

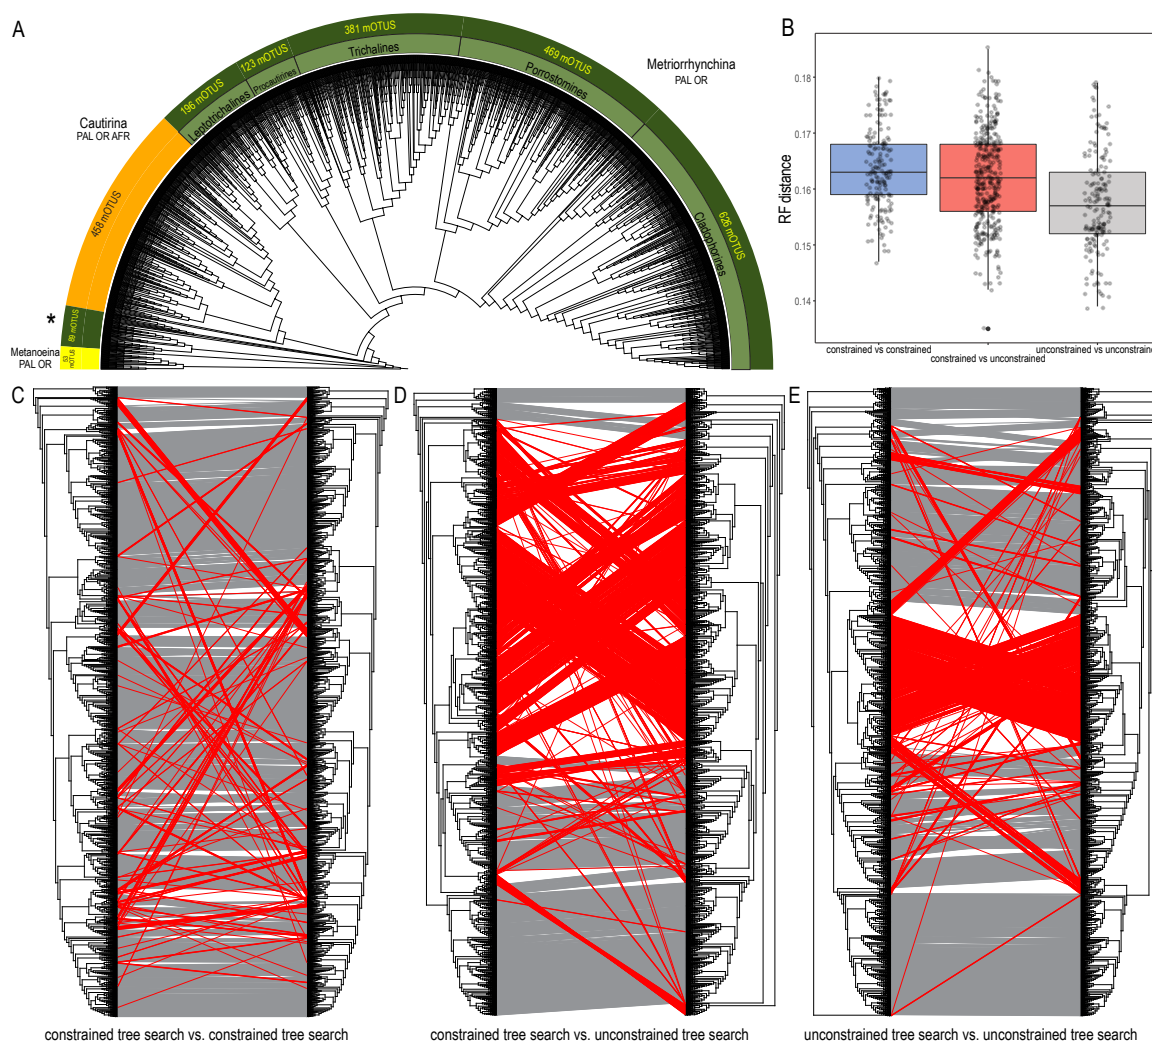

211

212 Figure 3. A – Relationships of 2,345 Metriorrhynchini species recovered by the constrained  
 213 analysis of the pruned dataset (The full resolution tree is shown in Fig. S15 along with a tree  
 214 recovered from the analysis of a complete dataset of 6,429 terminals in Fig. S14), asterisk  
 215 designates a grade of Metriorrhynchina-like taxa found in a position in conflict with their  
 216 morphology; B – A chart of Robinson-Foulds distances among topologies inferred by repeated  
 217 runs of the constrained and unconstrained analyses; C – A comparison of the results obtained by  
 218 two runs of the constrained analysis; D – A comparison of trees inferred with/without the  
 219 phylogenomic backbone; E – A comparison of results obtained by two runs of the unconstrained  
 220 analysis. The red lines designate terminals with conflicting positions in compared trees.

221

222

223 Following an extensive literature review, we updated species lists for the Cautirina  
 224 (641 spp.), Metanoeina (38 spp.), and Metriorrhynchina (895 spp.; Bocak *et al.*, 2020). By  
 225 analysing DNA data, we identified 456 spp. of Cautirina, 37 spp. of Metanoeina, and  
 226 1,852 spp. of Metriorrhynchina. The numbers of species per subregion, along with the  
 227 estimated ratios between formally described and estimated  $\alpha$ -diversity, are shown in Tab.



228 1. Even using a threshold of 5%, the number of putative species surpasses the number of  
 229 species reported in the literature.

230 We observed very high species turnover, and no species has been recorded in two  
 231 landmasses separated by a deep-sea (>200 m). Similarly, the faunas of Sulawesi and of  
 232 the surrounding large islands do not overlap. Only thirteen species were distributed  
 233 across two landmasses separated by an inundated shelf (sea depth <100 m). Eleven  
 234 species were distributed in two or more islands of the Great Sundas and two species  
 235 were found in both New Guinea and Australia. The centres of  $\alpha$ -diversity of the  
 236 Metriorrhynchini are New Guinea (1,434 spp.) and the seasonally to perennially humid  
 237 areas of the Sundaland (261 spp.). The results suggest substantial modifications to the  
 238 generic limits and ranges for numerous taxa that had been previously delimited (Fig.  
 239 S18).

240

241

242 Table 2. The number of described species and identified mOTUs (molecular operational  
 243 taxonomic units at 2% difference) per region. \* – some species are shared by two regions.

244

| Region                     | Metriorrhynchina | Cautirina      | Metanoeina   | Metriorrhynchini | Seq./Descr. |
|----------------------------|------------------|----------------|--------------|------------------|-------------|
| <b>Australian region</b>   | <b>639/1608</b>  |                |              | <b>639/1608</b>  | <b>2.52</b> |
| Australia                  | 196/167*         |                |              | 196/167          | 0.85        |
| New Guinea                 | 423/1434*        |                |              | 423/1434         | 3.39        |
| Solomon                    | 21*/9            |                |              | 21/9             | 0.43        |
| <b>Wallacea</b>            | <b>162/174</b>   | <b>14/10</b>   |              | <b>176/184</b>   | <b>1.05</b> |
| <b>Philippines</b>         | <b>51/18</b>     | <b>45/12</b>   | <b>8/3</b>   | <b>104/33</b>    | <b>0.32</b> |
| <b>Continental Asia</b>    | <b>43/52</b>     | <b>331/330</b> | <b>30/34</b> | <b>404/416</b>   | <b>1.03</b> |
| Sundaland                  | 36/44            | 201/184        | 24/19        | 261/247          | 0.95        |
| Indo-Burma                 | 6/7              | 62/52          | 3/4          | 74/63            | 0.85        |
| China, Japan               | 1/1              | 53/75          | 1/11         | 55/87            | 1.58        |
| India                      |                  | 35/19          | 2/0          | 37/19            | 0.51        |
| <b>Afrotropical region</b> |                  | <b>231/104</b> |              | <b>231/104</b>   | <b>0.46</b> |
| Africa                     |                  | 178/74         |              | 178/74           | 0.42        |
| Madagascar                 |                  | 53/30          |              | 53/30            | 0.57        |
| <b>Total</b>               | <b>895/1852</b>  | <b>641/456</b> | <b>38/37</b> | <b>1574/2345</b> | <b>1.50</b> |

245

246

247

248

249

250

## 251 **Discussion**

252 In the context of the present loss of biodiversity (Sodhi *et al.*, 2004; Hallmann *et al.*, 2017;  
253 Theng *et al.*, 2020), large-scale genomic resources are urgently needed for biodiversity  
254 assessment and conservation (Hajibabaei *et al.*, 2007; Krehenwinkel *et al.*, 2019).  
255 Molecular data cannot replace morphology-based taxonomy (Fig. 3C–D; Thomson *et al.*,  
256 2018), but the analyses of our dataset complement and facilitate traditional biodiversity  
257 research in several directions. Our first step is to compartmentalise hyperdiverse  
258 Metriorrhynchini into manageable natural units (Fig. 2). The densely sampled phylogeny  
259 identifies tribal and generic limits. It provides a useful foundation for detailed taxonomic  
260 research through the identification of weak areas in earlier classifications and points out  
261 the clades with undescribed diversity (Figs. 3, S18). Furthermore, the analyses of  
262 species-rich datasets identify the areas with high  $\alpha$ -diversity as one of the critical  
263 conservation value parameters (Tab. 2; Baselga, 2010; Srivathsan *et al.*, 2019).  
264 Traditional taxonomic research costs time and money, and the number of newly described  
265 species is relatively low if we consider the enormous diversity of tropical insects (Novotny  
266 *et al.*, 2006; Sangster & Luksenburg, 2014). Therefore, we use DNA-based units as a  
267 provisional descriptor of  $\alpha$ -diversity (Hebert *et al.*, 2003; Monaghan *et al.*, 2009), and  
268 subsequently as a source for integrative taxonomy (Figs. S14–S16; Srivathsan *et al.*,  
269 2019). The presented large-scale monitoring project provides information on relationships  
270 (Figs. 2, 3), genetic divergence (Figs. S14–S16), turnover (Tab. 2), the extent of generic  
271 and species ranges (Fig. S14–S16, S18), and on evolutionary phenomena that are  
272 usually studied using a few model organisms (Fig. 4). Using phylogenomics and voucher-  
273 based sequencing, we show that taxonomic literature has provided insufficient and  
274 sometimes erroneous information, even after the formal consolidation of scattered  
275 descriptions (Bocak *et al.*, 2020). We show that a taxon-focused continental scale project  
276 can effectively assemble comprehensive data for diversity of tropical insects.

277

### 278 ***Continent-wide taxon-specific monitoring of biodiversity: feasibility and*** 279 ***impediments***

280 Tissue and DNA archives have become critical in the assessment of biodiversity status  
281 (Hajibabaei *et al.*, 2007; Blom, 2021). Although museomics is a potentially valuable  
282 source of data (Gauthier *et al.*, 2020), in our case, museum collections are insufficient for  
283 filling data gaps due to the scarcity of material. For example, the Metriorrhynchini  
284 collection deposited in the Natural History Museum in London contains <3,000  
285 specimens, whereas there are ~6,500 terminals in our dataset. At the beginning of our  
286 study, we faced critical absence of primary data. Therefore, we conducted intensive field  
287 research to obtain samples for a realistic assessment of the extant Metriorrhynchini

288 diversity. We processed samples from our expeditions (most of which were focused on a  
289 range of topics over two decades between 2001 and 2019) and samples obtained through  
290 extensive collaboration with other researchers, both local and visiting, and with local  
291 naturalists whose contribution has increased with the growing number of citizen science  
292 projects (Jaskula *et al.*, 2021; MacPhail, & Colla, 2020). In such a way we assembled a  
293 Metriorrhynchini tissue collection from almost 700 localities in three continents (Tab. 1,  
294 Fig. 1). For several reasons our sampling is partly biased. We noted the serious loss of  
295 natural habitat in many regions. Previously described species were often collected in  
296 vicinity of seaports, but the lowland ecosystems are rapidly disappearing due to human  
297 exploitation. Therefore, type localities of many described species could not be sampled  
298 during recent expeditions and species known from museum collections are missing in our  
299 DNA dataset (Jiruskova *et al.*, 2019). The habitat loss in South East Asia also affects  
300 other animal groups, and lowland primary forests are seriously endangered in the whole  
301 region (Sodhi *et al.*, 2004, Theng *et al.*, 2020). Further sampling bias is a consequence of  
302 the unsafe conditions and logistic problems in large areas of West Africa, Sahel, and the  
303 Congo Basin (Fig. 1A), where net-winged beetles have not been systematically studied  
304 since the 1930s. Additional data gaps are caused by strict biodiversity research  
305 restrictions (Prathapan *et al.*, 2018; Laird *et al.*, 2020). Regardless of these limitations, we  
306 believe that the assembled dataset is a foundation for a robust classification framework  
307 and a soundly based assessment of biodiversity. Our results show the importance of field  
308 research for biodiversity studies and systematics (Basset & Lamarre, 2019).

309

### 310 ***Phylogenetic relationships: a scaffold for targeted research***

311 Unresolved taxonomy is a common reason for the exclusion of specific groups from  
312 biodiversity research projects and this omission has an effect on conservation policies  
313 (Gutierrez & Helgen, 2013). The current phylogenomic and mitogenomic phylogenetic  
314 hypotheses (Figs. 2, 3; S14–S16) supersede the morphology-based topologies (Bocak,  
315 2002). The phylogenomic analysis incorporates a large amount of information, and we  
316 favour this method over morphological traits and short DNA sequences, both of which  
317 contain uncertainties (McKenna *et al.*, 2019). Phylogenomics has resolved subtribe  
318 relationships and their internal structures. The analysed 35 transcriptomes and low-  
319 coverage genomes were sufficient to identify five major Metriorrhynchina clades (with  
320 100–600 putative species each) and also to identify the limits of genera, which can be  
321 tested using traditional taxonomic methods (Figs. 2, 3A, S14–S16).

322 The sampling strategy is critical for building a phylogenomic backbone, and our goal  
323 was to cover as many deep lineages as possible. Therefore, we sequenced RNAlater  
324 preserved tissues and conspecific vouchers prior to assigning tissue samples for

325 transcriptomic analyses. In this way, two rounds of sequencing provided us with critical  
326 information based on evenly distributed anchor taxa. In the next step, we re-analysed the  
327 short-fragment dataset (Tab. S3) using constrained positions for taxa whose relationships  
328 had already been recovered through phylogenomics (Figs. 2, 3). A stabilised  
329 phylogenomic backbone is critical for inferring a robust topology because the analyses of  
330 short mtDNA fragments are sensitive, even to the application of starting seeds, and they  
331 often produce topologies incongruent with morphological traits (Figs. 3B, E). Only several  
332 small lineages have remained unanchored by genomic data, owing to a lack of properly  
333 fixed samples (Figs. S15, S16). For example, four small clades are much more deeply  
334 rooted than their morphology suggests (Figs. 3A, S15) and additional data are needed to  
335 place them in a phylogenetic context.

336 Our approach yielded a phylogeny with 6,429 terminals and 2,345 mOTUs, and this  
337 provides the basis for the approximation of  $\alpha$ -diversity (Figs. 3, S15, S16). Concerning the  
338 extent of diversity, phylogenomic and mitochondrial data must be simultaneously  
339 analysed to provide a strong foundation for subsequent investigations (Fig. 3C).  
340 Phylogenomics cannot deal with thousands of species, and mitogenomic data are  
341 insufficient for the construction of robust relationships. The final steps are morphological  
342 validation (see Supplementary Text) and, in the future, formal descriptions of biodiversity  
343 using the Linnean classification. In such a way, the results of phylogenomic and  
344 mitogenomic inventory should be incorporated in the Linnean classification (Godfray &  
345 Knapp, 2004).

346

#### 347 ***Alpha-diversity: literature data and reality***

348 Here, we deal with a tropical beetle tribe with >1,500 described species, and our results  
349 indicate that regionally up to 3.4 times that number of species remain undescribed (Tab.  
350 2). When analysing *cox1* mtDNA, we identified 2,345 mOTUs based on an arbitrary  
351 distance threshold of 2 % uncorrected pairwise distance (Hebert *et al.*, 2003). The  
352 application of the threshold is a compromise between estimation accuracy, speed, and  
353 sequencing costs, taking into account the feasibility of inventorying a hyperdiverse group  
354 within a limited timeframe (Dupuis *et al.*, 2012; Eberle *et al.*, 2020). We had previously  
355 explored a subset of Metriorrhynchini to estimate the congruence between mtDNA and  
356 morphology, and between nextRAD- and mtDNA-based species limits. We found similar  
357 numbers of species regardless of the approach that was applied (e.g., Bocek *et al.*, 2019,  
358 Jiruskova *et al.* 2019). Additionally, the slope representing the relationship between the  
359 number of mOTUs and distance thresholds was gradual (Fig. S17) due to a high number  
360 of genetically distant, indisputably distinct lineages (Figs. S15, S16). Therefore, we

361 assume that our estimates of  $\alpha$ -diversity are realistic, although future taxonomic revisions  
362 are needed for validation.

363 Our approach provides information about the diversity of the internal lineages.  
364 Metriorrhynchina is by far the most diverse group, within which the cladophorines  
365 comprise the largest clade (626 mOTUs, *Ditua* historically has included 2 spp. now ~300  
366 spp.). The porrostomine clade is the next diverse group (346 spp.) and contains the  
367 speciose *Porrostoma* (156 spp.) and a paraphyletic series of lineages whose species  
368 have conventionally been placed in *Metriorrhynchus*. The differences between previously  
369 published data and our results are substantial (Figs. S15, S16).

370 The numbers of mOTUs must be interpreted in the context of the sampling activity in  
371 each region. We identified only 104 mOTUs from the Afrotropical region, mainly due to  
372 the limited number of collecting trips (5 person months; 64 localities) and the  
373 inaccessibility of some areas. Despite intensive field research (4 person months, 33  
374 localities), we collected from the Philippines less than one third of the species described.  
375 Our collection activities in the Philippines were hindered by substantial loss of natural  
376 habitats, and this is soon expected to be the case in other regions (Sodhi *et al.*, 2004).  
377 The number of species known from the Sundaland (16 person months, 114 localities) was  
378 approximately equal to the number of sequenced mOTUs. Many regions remain  
379 unsampled and species ranges are small (Jiruskova *et al.*, 2019), so this number will  
380 increase in the future. The proportion of new species was regionally ~70% if DNA data  
381 and morphology were considered in detailed taxonomic studies (e.g., Jiruskova *et al.*,  
382 2019). While these regions house numerous unknown species, we found New Guinea to  
383 be exceptionally diverse, with 3.4 times the number of species reported in the literature  
384 (1,434 mOTUs; 7 person months; 175 localities). Despite the relatively large number of  
385 sampled localities, many areas of New Guinea remain unexplored (Fig. 1A), and  
386 additional species were added to the dataset with each batch of sequenced samples from  
387 other localities.

388 We observed a high turnover between regions, and few species had ranges which  
389 included landmasses separated by shallow seas (2 spp. Queensland / New Guinea, 11  
390 spp. Sundaland islands; Fig. S14). Poorly dispersing lycids generally have very small  
391 ranges, except for the few genera that visit flowers and fly in open areas (Kusy *et al.*,  
392 2021). A similar small-scale turnover has recently been reported along altitudinal  
393 gradients (Bocek *et al.*, 2019; Motyka *et al.*, 2020, 2021). A high turnover indicates a large  
394 proportion of hidden diversity, especially in tropical mountains (Merckx *et al.*, 2015;  
395 Mastretta-Yanes *et al.*, 2018). Mountain fauna is especially vulnerable to climate change  
396 and its inventorying is urgently needed.



397 The Metriorrhynchini has recently received considerable attention in taxonomic  
398 studies, and 302 species have been described by several authors over the past three  
399 decades, making a total of 1,574 formally described species (Tab. 1, Bocak et al. 2020;  
400 Supplementary Text and References). Although the recent 24% increase in described  
401 diversity appears substantial, the distance-based analysis indicates the presence of 2,345  
402 mOTUs (Fig. S17). An additional ~50 putative species (494 terminals) were identified, but  
403 this identification was only based on divergent morphology because of the absence of  
404 *cox1*. We assume that our sampling represents only a subset of all known species  
405 (<50%). It means that the dataset contains 1,000–1,500 undescribed species. At the  
406 current rate, formal morphological descriptions of an additional 1,000+ species would take  
407 100 years. This is a very long time in the context of the ongoing deforestation and  
408 fragmentation of natural habitats, and currently undocumented diversity might be lost long  
409 before it can be catalogued (Brooks *et al.* 2002; Sodhi *et al.* 2004; Ceballos *et al.*, 2015;  
410 Theng *et al.*, 2020). The rapid DNA-based inventory is an effective shortcut for obtaining  
411 basic information on the true diversity of tropical beetles and for setting a benchmark for  
412 future biodiversity re-evaluations.

413 The results reveal major biodiversity hotspots in New Guinea and the Sundaland.  
414 Tropical rainforests currently cover most of New Guinea, a tectonically young island that  
415 has not been considered a biodiversity hotspot for vertebrates (Myers *et al.*, 2000, Hall,  
416 2011, Toussaint et al. 2014). In the case of net-winged beetles, we show that the New  
417 Guinean fauna is phylogenetically diverse, spatially heterogeneous, and extremely rich as  
418 regards both the number of species and the endemic genera (Tab. 1). Additionally, the  
419 large clades of New Guinean species indicate that the diversification of major lineages  
420 preceded the uplift of the islands, and possibly started on the norther margin of the  
421 Australian craton and adjacent islands. Southeast Asia is a centre of phylogenetic  
422 diversity at the tribal level; its fauna contains all principal lineages and the highest  
423 diversity of Cautirina but is smaller than those of New Guinea. The Afrotropical and  
424 Palearctic regions represent only recently populated low-diversity outposts.

425

#### 426 ***Impact of biodiversity inventorying on biogeographical and evolutionary research***

427 Detailed data on Metriorrhynchini diversity indicate low dispersal propensity and this  
428 makes Metriorrhynchini a promising model for biogeographic studies. Our densely  
429 sampled phylogeny did not find any long-distance dispersal events, in contrast to many  
430 studies of flying beetles (Balke *et al.*, 2009; Jordal *et al.*, 2015). Most recovered overseas  
431 dispersal events are limited to distances of less than 100 km and are commonly  
432 accompanied by speciation (Fig. S15, S16). The high proportion of erroneous placement  
433 of many taxa (Fig. S18; Bocak *et al.*, 2020) renders the distribution data cited in previous

434 literature unsuitable for phylogeographic investigations, and revision of the classification is  
 435 important in order to understand the true distribution of individual taxa. The original and  
 436 revised ranges of selected genera are compared in Fig. S18 as examples.

437 Intensive biodiversity research has the potential to fill knowledge gaps concerning  
 438 evolutionary phenomena that are mainly studied using a small number of model species,  
 439 and the research can identify the unique attributes of other potential models. We  
 440 document the contribution of a large-scale biodiversity inventory to evolutionary studies  
 441 with two examples.

442 Net-winged beetles include several lineages in which females have lost the ability to  
 443 completely metamorphose (Bocak *et al.*, 2008; McMahon & Hayward, 2016). If a putative  
 444 neotenic species is discovered, a comprehensive reference database of the group may  
 445 identify its closest relatives. We used our data to place the East African *Cautires apterus*  
 446 in a phylogenetic context, and the results indicated that it may be the youngest neotenic  
 447 taxon of all net-winged beetles (36.1 my, Fig. 4).

448

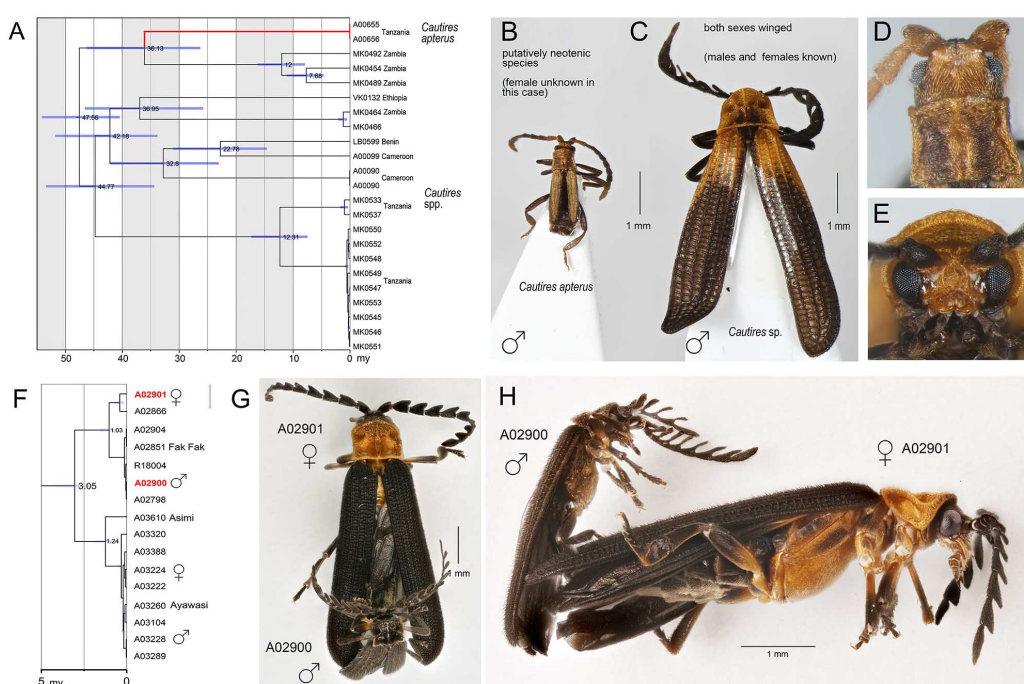

449

450

451 Figure 4. Identification of sexual dimorphism by large scale biodiversity inventory. A –  
 452 Relationships of lineages with modified ontogeny, the dated tree; B, D – general appearance and  
 453 head of *Cautires apterus*, a putative neotenic species; C, E – ditto of the close relative with both  
 454 sexes winged. Mimetic sexual dimorphism identified during diversity survey. F – the dated tree,  
 455 red coloured terminal labels designate the individuals shown in G and H; G – dorsal view of  
 456 individuals in copula; H – ditto, lateral view. Except of collecting individuals in copula, DNA-based  
 457 assessment of relationships is the only option as the species are sexually dimorphic and no  
 458 morphological traits indicate their conspecificity.

459

460 Our extensive DNA database of metriorrhynchine diversity may also play an important  
461 role in the study of the evolution of mimicry. Our inventory identified an extreme and  
462 previously unknown aposematic dimorphism in New Guinean metriorrhynchines (Fig. 4).  
463 The placement of sexually dimorphic species in the phylogeny suggests that the shift to  
464 dimorphism was very recent (3.0 mya at the earliest) and began when both sexes were  
465 small-bodied. Mimetic sexual polymorphism is well understood in butterflies with non-  
466 mimetic males and mimetic females (Kunte, 2008), but the advergence of males and  
467 females to different aposematic models has only recently been reported in two  
468 subfamilies of net-winged beetles (Motyka *et al.*, 2018, 2020, 2021). Divergent evolution  
469 in Müllerian systems appears to be more common in multi-pattern aposematic rings than  
470 was previously believed when morphology was the sole source of information.

471

## 472 **Conclusion**

473 Priority areas for global conservation have usually been identified based on richness,  
474 species endemism and vulnerability of vertebrates (Myers *et al.*, 2000; Holt *et al.*, 2013).  
475 We assume that different patterns of biodiversity distribution can be revealed if other  
476 animal groups are studied. Reliable information on additional groups can focus our  
477 conservation efforts on valuable regions (Morrison *et al.*, 2009; Thomson *et al.*, 2018).  
478 Our model, beetles, is the most speciose group of animals but is much less known than  
479 vertebrates. Therefore, new data must be generated, and our research workflow must be  
480 innovative. We conducted a worldwide sampling in ~700 localities, analysed  
481 transcriptomes, genomes, and mitochondrial markers (>2,300 species), and validated our  
482 results with morphology. We achieved substantial progress with respect to the  
483 development of a Metriorrhynchini tree of life (Chesters, 2017; Linard *et al.*, 2018). The  
484 voucher-based DNA entries established a framework for classifying samples from other  
485 studies, such as environmental sequencing (Linard *et al.*, 2016; Andujar *et al.*, 2015;  
486 Arribas *et al.*, 2016). Despite limited time and funding, we identified >2,300 mOTUs which  
487 indicate that there are at least twice more species than the number previously reported in  
488 the literature. This means that, at a conservative estimate, 1,000–1,500 species in the  
489 dataset were previously unknown to science. Furthermore, we identified New Guinea as a  
490 biodiversity hotspot, which is in clear contrast with studies identifying the biodiversity  
491 patterns of vertebrates. Our accelerated inventory shows that the literature records of  
492 tropical beetles cannot be used for biodiversity conservation and meta-analyses without  
493 critical revision. We suggest that if ~20 person months of focused field research and  
494 subsequent workflow steps are applied to any hyperdiverse tropical group, the results can  
495 set a benchmark for future evaluation of spatiotemporal changes in biodiversity.

496

## 497 **Material and methods**

### 498 *Field research*

499 The analysed individuals had been accumulated by numerous expeditions to various  
500 regions of the Metriorrhynchini range (Fig. 1A, Tab. S1). The distribution of sampling sites  
501 was partly biased, and no samples are available from West Africa, Congo Basin, Sahel,  
502 Sri Lanka, and the Lesser Sundas. About 10% of samples were provided by other  
503 researchers.

504 Tissues for transcriptomic analyses were fixed in the field. As field identification is  
505 generally unreliable, we preferred to collect pairs *in copula*, then the female was fixed  
506 using RNAlater, and the male kept separately in 96% ethanol for Sanger sequencing and  
507 the voucher collection. Alternatively, the morphologically similar individual from the same  
508 place was fixed in ethanol and the identity of an individual assigned for transcriptomic  
509 analysis was confirmed by sequencing *cox1* mtDNA using tissue from the specimen  
510 preserved in RNAlater and putatively conspecific voucher (Fig. 2). About 100 tissue  
511 samples were fixed and thirty-five of them were used for sequencing (Tab. S2). Earlier  
512 published transcriptomes were added (McKenna *et al.*, 2019; Kusy *et al.* 2019). Due to  
513 the inaccessibility of properly fixed tissue, the two critical samples were shotgun  
514 sequenced using isolated DNA.

515 Almost 7,000 samples from 696 localities (Tab. 1) were included in the sequencing  
516 program to obtain short mtDNA fragments. In total, 6,429 yielding at least a single  
517 fragment were included in the analysis (Tab. S3). The analysed data set contained some  
518 previously published sequences (e.g., Sklenarova *et al.*, 2013; Bocek & Bocak, 2019).  
519 Voucher specimens are deposited in the collection of the Laboratory of Biodiversity and  
520 Molecular Evolution, CATRIN-CRH, Olomouc.

521

### 522 *Genomic and transcriptomic sequencing, data analysis*

523 Libraries for thirty transcriptomes were prepared by Novogene Co., Ltd. (Beijing, China)  
524 and sequenced on the HiSeq X-ten platform (Illumina Inc., San Diego, CA). The removal  
525 of low-quality reads and TruSeq adaptor sequences were performed using fastp v.0.20.0  
526 (Chen *et al.*, 2018) with the following parameters: -q 5 -u 50 -l 50 -n 15. All paired-end  
527 transcriptomic reads were assembled using SOAPdenovo-Trans-31mer (Xie *et al.*, 2014).

528 Additionally, the total DNA (~33 Gb each) of *Metanoeus* sp. and an unidentified  
529 sample Metriorrhynchina species (Voucher JB0085) was shotgun-sequenced on the  
530 same platform. Reads were filtered with fastp using the same settings as above and  
531 quality was visualized with FastQC ([http://www.bioinformatics.babraham.ac.uk/](http://www.bioinformatics.babraham.ac.uk/projects/fastqc)  
532 projects/fastqc). The draft genomes were assembled using SPAdes v.3.13.1 (Bankevich

533 *et al.*, 2012), with k-mer sizes of 21, 33, 55, 77, and 99. Obtained contigs were used to  
 534 train Augustus (Stanke & Waack, 2003) for species-specific gene models with BUSCO.  
 535 Predicted species-specific gene models were then used for *ab initio* gene predictions in  
 536 Augustus and predicted protein-coding sequences were used for subsequent analyses.  
 537 Outgroup taxa were reported in previous studies (Kusy *et al.*, 2019; McKenna *et al.*,  
 538 2019).  
 539

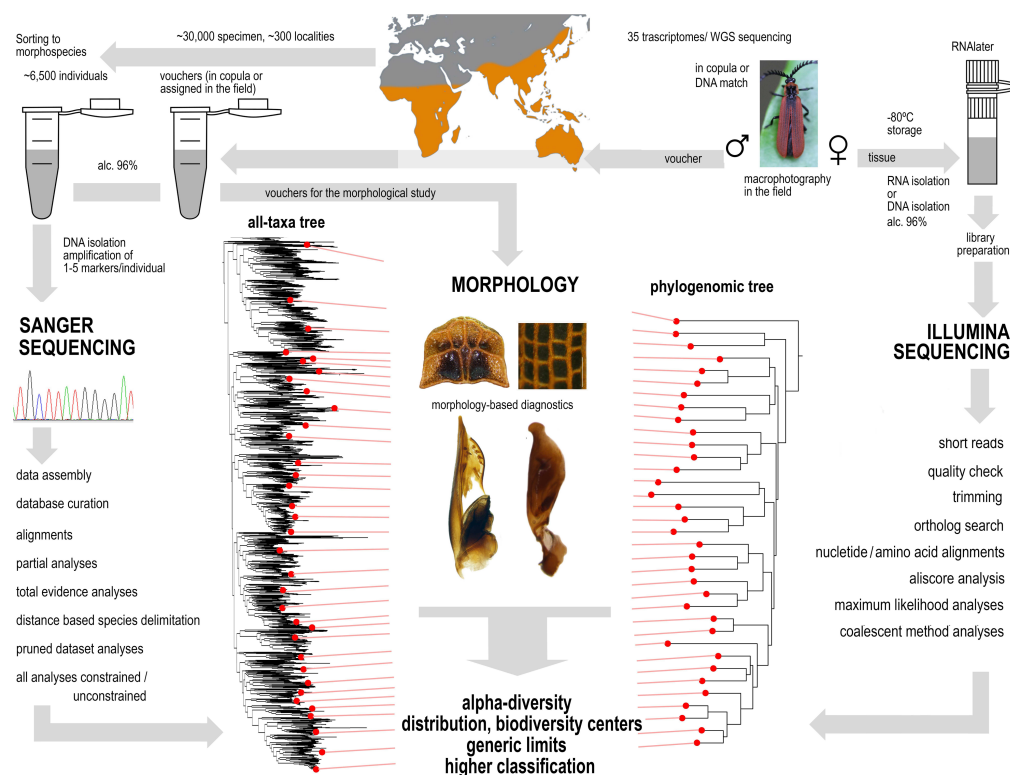

540  
 541 Figure 5. A sequence of applied methods from sampling to hypotheses.  
 542

543 The ortholog set was collated by searching the OrthoDB 9.1 (Zdobnov *et al.*, 2016) for  
 544 single copy orthologs in six beetle genomes (Tab. S4). We used Orthograph v.0.6.3  
 545 (Petersen *et al.*, 2017) with default settings to search in our assemblies for the presence  
 546 of specified single copy orthologs. From the recovered 4,193 orthologs, terminal stop  
 547 codons were removed, and internal stop codons at the translational and nucleotide levels  
 548 were masked. The amino acid sequences were aligned using MAFFT v.7.471 with the L-  
 549 INS-i algorithm (Kato & Standley, 2013). The alignments from each ortholog group were  
 550 then checked for the presence of outliers. To identify random or ambiguous similarities  
 551 within amino acid alignments, we used Aliscore v.2.076 with the maximum number of  
 552 pairwise comparisons  $-r 10^{27}$ , option *-e.* and we masked them using Alicut v.2.3 (Kück *et*  
 553 *al.*, 2010). Alinuc.pl was then used to apply the Aliscore results to match amino acids to  
 554 the nucleotide data. MARE v.0.1.2-rc was used to calculate the information content of



555 each gene partition (Misof *et al.*, 2013). Partitions with zero information content were  
556 removed at both levels. Finally, the remaining 4,109 alignments were retained for  
557 subsequent multispecies coalescent analyses, and different concatenated datasets were  
558 generated for both amino acid and nucleotide levels using FasConCat-G v.1.4 (Kück &  
559 Longo, 2014) (Tab. S5 and supplementary methods). The degree of missing data and  
560 overall completeness scores (Ca) across all datasets were inspected using AliStat v.1.7  
561 (<https://github.com/thomaskf/AliStat>).

562

### 563 *Compositional heterogeneity tests*

564 To explore the effect of among species compositional heterogeneity and its possible bias  
565 to tree reconstruction, we inspected the data with BaCoCa v.1.105 (Kück & Struck, 2014)  
566 to identify the gene partitions that strongly deviate from compositional homogeneity using  
567 relative composition frequency variation value (RCFV). Following Vasilikopoulos *et al.*  
568 (2019), we considered compositional heterogeneity among species in a given partition to  
569 be high when  $RCFV \geq 0.1$ . The heterogeneous partitions were excluded from the data to  
570 generate a more compositionally homogeneous dataset. We used Maximum Symmetry  
571 Test (Naser-Khdour *et al.*, 2019) to identify the partitions that strongly deviate from  
572 compositional homogeneity at the nucleotide level (p-value cut off <0.05), and partitions  
573 below the threshold were excluded. The software SymTest v.2.0.49  
574 (<https://github.com/ottmi/symtest>) was used to calculate the overall deviation from  
575 stationarity, reversibility, and homogeneity (SRH) (Ababneh *et al.*, 2006)

576

### 577 *Phylogenomic maximum likelihood analyses*

578 For all datasets, phylogenetic reconstruction was performed using the maximum  
579 likelihood (ML) criterion with IQ-TREE 2.1.2 (Minh *et al.*, 2020). First, we analysed all  
580 datasets using the original gene partition boundary. The model selection for each gene  
581 was performed with ModelFinder (Chernomor *et al.*, 2016; Kalyaanamoorthy *et al.*, 2017)  
582 implemented in IQ-TREE2 (-MFP option). GTR model was considered for nucleotide  
583 supermatrices. For the amino acid supermatrices, the substitution models LG, DCMUT,  
584 JTT, JTTDCMUT, DAYHOFF, WAG, and free rate models LG4X and LG4M were tested.  
585 All possible combinations of modelling rate heterogeneity among sites were allowed  
586 (options: -mrate E,I,G,I+G,R -gmedian -merit BIC). We used the edge-linked partitioned  
587 model for tree reconstructions (-spp option) allowing each gene to have its own rate. The  
588 optimized partition schemes and best-fitting models were inferred for some datasets using  
589 -m MFP+MERGE and the considering same substitution models as above. The fast-  
590 relaxed clustering algorithm was used to speed up computation during partition-scheme  
591 optimization (Lanfear *et al.*, 2017). Ultrafast bootstrap (Hoang *et al.*, 2017) and SH-like

592 approximate likelihood ratio test (SH-aLRT) were calculated in IQ-TREE2 (options -bb  
593 5000 and -alrt 5000) to assess nodal supports for focal relationships.

594

#### 595 *Coalescent analyses and analyses of the confounding and alternative signal*

596 To account for variation among gene trees owing to incomplete lineage sorting and to  
597 account for potential gene tree heterogeneity and discordance (Edwards, 2009), the data  
598 were also analysed using the coalescent-based species-tree method. For every single  
599 gene partition, we calculated an ML gene tree in IQ-TREE2, with 5000 ultrafast bootstrap  
600 replicates (-bb option) and using the same substitution models as predicted by  
601 ModelFinder in the above described partitioned analyses. For subsequent coalescent  
602 species tree estimation, the Accurate Species Tree Algorithm (ASTRAL-III v.5.7.3; Zhang  
603 *et al.*, 2018) was used. To account for very poorly resolved branches on gene trees,  
604 branches with ultrafast bootstrap  $\leq 10$  were collapsed using newick utilities v.1.6 (Junier &  
605 Zdobnov, 2010) in every ASTRAL analysis. Local posterior probabilities (Erfan & Mirarab,  
606 2016) and quartet frequencies of the internal branches in every species tree were  
607 calculated using the parameter '-t=2'. Pie charts representing quartet scores for the given  
608 topology and two alternatives were plotted to the resulting species trees in R using  
609 [https://github.com/sidonieB/scripts/blob/master/plot\\_Astral\\_trees\\_v2.R](https://github.com/sidonieB/scripts/blob/master/plot_Astral_trees_v2.R).

610 Additionally, we studied the effect of potentially confounding signals, like non-random  
611 distribution of data coverage and violations of SRH conditions, on our phylogenetic  
612 reconstructions with the Four-cluster likelihood mapping (FcLM) approach (Strimmer &  
613 von Haeseler, 1997) implemented in IQ-TREE2. Based on the results of our tree  
614 reconstructions we tested the hypotheses about the alternative placement of  
615 leptotrichaline and procautirine clades.

616

#### 617 *Mitochondrial DNA sequencing and data analysis*

618 Total DNA was extracted from the metathorax with a Wizard SV96 kit (Promega Corp.,  
619 Madison, WI). The yield was measured using a NanoDrop-1000 Spectrophotometer  
620 (Thermo Fisher Scientific Inc., Waltham, MA). The PCR settings and cycle sequencing  
621 conditions were the same as those used by Bocak *et al.* (2008). Three fragments of  
622 mitochondrial genome were sequenced: *cox1* + tRNA-*Leu* + *cox2* (~1100 bp), *rrnL* +  
623 tRNA-*Leu* + *nad1* (~800 bp), and ~1210 bp of *nad5* and adjacent tRNA-*Phe*, tRNA-*Glu*,  
624 and tRNA-*Ser* mtDNA (the mtDNA fragments are further mentioned as *rrnL*, *cox1*, and  
625 *nad5*). The PCR products were purified using PCRu96™ Plates (Merck Millipore Inc.,  
626 Burlington, MA) and sequenced by an ABI 3130 (Applied Biosystems, Waltham, MA)  
627 sequencer using the BigDye® Terminator Cycle Sequencing Kit 1.1 (Applied Biosystems,  
628 Waltham, MA). Sequences were edited using Sequencher v.4.9 software (Gene Codes

629 Corp., Ann Arbor, MI). Altogether 6,476 individuals were analysed including some  
630 previously published (Sklenarova *et al.*, 2013; Bocek & Bocak, 2019).

631 The *cox1* gene fragment was used to OTUs delimitation (Blaxter *et al.*, 2005)  
632 using CD-hit-est (Fu *et al.*, 2012) and different thresholds (from similarity 0.99 to 0.90 by  
633 0.05 steps). Therefore, we assembled two datasets: A) the dataset containing all  
634 sequenced individuals and B) all OTUs delineated by 0.98 similarity of the *cox1* gene. The  
635 *rnrL* and *tRNAs* were aligned using MAFFT 7.2 with Q-INS-I algorithm (Katoh & Standley,  
636 2013), protein-coding genes were eye-checked for stop codons and aligned using Trans-  
637 Align (Bininda-Emonds, 2005). All fragments were concatenated using FasConCat (Kück  
638 & Longo, 2014) and analysed under maximum-likelihood criterium in IQ-TREE v.2.1.2  
639 (Minh *et al.*, 2020; Tab. S6). To assess the branch supports values, we used SH-aLRT  
640 test with 1,000 iterations. ModelFinder tool implemented in IQ-TREE was used to identify  
641 the best fit models using the Bayesian Information Criterion (Chernomor *et al.*, 2016). The  
642 results of the TSA/WGS analyses were used to constrain basal topology among major  
643 clades of Metriorrhynchini in both analyses of datasets A and B. Further, we ran  
644 unconstrained analyses of the above-mentioned datasets with identical settings except -g  
645 option to compare results. We replicated constrained tree search nineteen-times and  
646 compared resulting trees using Robinson–Foulds distances in R package phangorn  
647 (Schliep, 2011; Tab. S7). Randomly chosen trees were then compared using cophylo  
648 script (phytools; Revell, 2012) with argument rotate = TRUE.

649  
650 Supplementary Materials: The supplementary files are available online here.

651  
652 Data Depositories. The mitogenomic dataset and all the analysed supermatrices are  
653 deposited in the Mendeley Data repository DOI: 10.17632/ntgg6k4fjx.1.

654  
655  
656 Author Contributions: Conceptualization, L.B., DK, MM; formal analyses, M.M. (Sanger  
657 data), D.K. (phylogenomic data); data production and curation, L.B., M. B. and R.B.;  
658 writing, original draft preparation, L.B., M.M., D.K.; writing—review and editing, L.B., M.M.,  
659 D.K., M.B., R.B.; visualization, L.B., M.M., D.K.; funding acquisition, L.B., M.M., D.K. All  
660 authors have read and agreed to the published version of the manuscript.

661  
662 Funding: This research was funded by The Czech Science Foundation, grant number 18-  
663 14942S.

664  
665

666 **Acknowledgements**

667 Several colleagues provided samples from their respective home countries or their own  
668 field research. The field research was enabled by the permits from the Government of  
669 Papua New Guinea and the Queensland Ministry of Environment, Malaysian Ministry of  
670 Natural Resources, and UP Los Baños. The trips to Papua New Guinea were supported  
671 by the Binatang research centre, Nagada and we are obliged to H. Maraia and J. Kua for  
672 their field assistance. A substantial part of the research before the start of the project was  
673 funded by the senior author and Palacky University is acknowledged for granting the  
674 leave. L. Harmackova advised with some analyses in R.

675

676 Conflicts of Interest: The authors declare no conflict of interest.

677

678

679 **References**

680 Ababneh, F., Jermiin, L. S., Ma, Ch. & Robinson, J. (2006). Matched-pairs tests of  
681 homogeneity with applications to homologous nucleotide sequences.

682 *Bioinformatics*, 22, 1225–1231. <https://doi.org/10.1093/bioinformatics/btl064>

683 Andújar, C., Arribas, P., Ruzicka, F., Crampton-Platt, A., Timmermans, M. J. T. N. &

684 Vogler, A. P. (2015). Phylogenetic community ecology of soil biodiversity using  
685 mitochondrial metagenomics. *Molecular Ecology*, 24, 3603–3617.

686 <https://doi.org/10.1111/mec.13195>

687 Arribas, P., Andújar, C., Hopkins, K., Shepherd, M. & Vogler, A. P. (2016). Metabarcoding  
688 and mitochondrial metagenomics of endogean arthropods to unveil the mesofauna  
689 of the soil. *Methods in Ecology & Evolution*, 7, 1071–1081.

690 <https://doi.org/10.1111/2041-210X.12557>

691 Balke, M., Ribera, I., Hendrich, L., Miller, A. M., Sagata, K., ... Meier, R. (2009). New

692 Guinea highland origin of a widespread arthropod supertramp. *Proceedings of the*  
693 *Royal Society B – Biological Sciences*, 276, 2359–2367.

694 <https://doi.org/10.1098/rspb.2009.0015>

695 Bankevich, A., Nurk, S., Antipov, D., Gurevich, A. A., Dvorkin, M., ... Pevzner P. A.

696 (2012). SPAdes: a new genome assembly algorithm and its applications to single-  
697 cell sequencing. *Journal of Computational Biology*, 19, 455–477.

698 <https://doi.org/10.1089/cmb.2012.0021>

699 Baselga, A. (2010). Partitioning the turnover and nestedness components of beta  
700 diversity. *Global Ecology and Biogeography*, 19, 134–143.

701 <https://doi.org/10.1111/j.1466-8238.2009.00490.x>

- 702 Basset, Y. & Lamarre, G. P. A. (2019). Toward a world that values insects. *Science*, 364  
703 (6447), 1230–1231. <https://doi.org/10.1126/science.aaw7071>
- 704 Bininda-Emonds, O. R. (2005). transAlign: using amino acids to facilitate the multiple  
705 alignment of protein-coding DNA sequences. *BMC Bioinformatics*, 6, 156.  
706 <https://doi.org/10.1186/1471-2105-6-156>
- 707 Blaxter, M., Mann, J., Chapman, T., Thomas, F., Whitton, C., ... Abebe, E. (2005).  
708 Defining operational taxonomic units using DNA barcode data. *Philosophical*  
709 *Transactions of the Royal Society B – Biological Sciences*, 360, 1935–1943.  
710 <https://doi.org/10.1098/rstb.2005.1725>
- 711 Blom, M. P. K. (2021). Opportunities and challenges for high-quality biodiversity tissue  
712 archives in the age of long-read sequencing. *Molecular Ecology*.  
713 <https://doi.org/10.1111/mec.15909>.
- 714 Bocak, L. (2002). Revision and phylogenetic analysis of Metriorrhynchinae. *European*  
715 *Journal of Entomology*, 99, 315–351. <https://doi.org/10.14411/eje.2002.043>
- 716 Bocak, L., Bocakova, M., Hunt, T. & Vogler, A. P. (2008). Multiple ancient origins of  
717 neoteny in Lycidae (Coleoptera): consequences for ecology and macroevolution.  
718 *Proceedings of the Royal Society – Biological Sciences*, 275, 2015–2023.  
719 <https://doi.org/10.1098/rspb.2008.0476>
- 720 Bocak, L., Kunderata, R., Andújar, C. & Vogler A. P. (2016). The discovery of  
721 Iberobaeniidae (Coleoptera: Elateroidea): a new family of beetles from Spain, with  
722 immatures detected by environmental DNA sequencing. *Proceedings of the Royal*  
723 *Society of London B – Biological Sciences*, 283, 20152350.  
724 <https://doi.org/10.1098/rspb.2015.2350>.
- 725 Bocak, L., Motyka, M., Kusy, D. & Bilkova, R. (2020). Biodiversity inventory and  
726 distribution of Metriorrhynchina net-winged beetles (Coleoptera: Lycidae), with the  
727 identification of generic ranges. *Insects*, 11, 710.  
728 <https://doi.org/10.3390/insects11100710>
- 729 Bocek, M. & Bocak, L. (2019). The origins and dispersal history of the trichaline net-  
730 winged beetles in South East Asia, Wallacea, New Guinea and Australia.  
731 *Zoological journal of the Linnean Society*, 185, 1079–1094.  
732 <https://doi.org/10.1093/zoolinnean/zly090>
- 733 Bocek, M., Kusy, D., Motyka, M. & Bocak, L. (2019). Persistence of multiple patterns and  
734 intraspecific polymorphism in multi-species Müllerian communities of net-winged  
735 beetles. *Frontiers in Zoology*, 16, 38. <https://doi.org/10.1186/s12983-019-0335-8>
- 736 Brooks, T. M., Mittermeier, R. A., Mittermeier, C. G., da Fonseca, G. A. B., Rylands, A. B.,  
737 ... Hilton-Taylor, C. (2002). Habitat loss and extinction in the hotspots of



- 738 biodiversity. *Conservation Biology*, 16, 909–923. <https://doi.org/10.1046/j.1523->  
739 1739.2002.00530.x
- 740 Ceballos, G., Ehrlich, P. R., Barnosky, A. D., García, A., Pringle, R. M. & Palmer, T. M.  
741 (2015). Accelerated modern human – induced species losses: entering the sixth  
742 mass extinction. *Science Advances*, 1, e1400253.
- 743 Chen, S., Zhou, Y., Chen, Y. & Gu, J. (2018). Fastp: an ultra-fast all-in-one FASTQ  
744 preprocessor. *Bioinformatics*, 34, i884–i890.  
745 <https://doi.org/10.1093/bioinformatics/bty560>
- 746 Chernomor, O., von Haeseler, A. & Minh, B. Q. (2016). Terrace aware data structure for  
747 phylogenomic inference from supermatrices. *Systematic Biology*, 65, 997–1008.  
748 <https://doi.org/10.1093/sysbio/syw037>
- 749 Chesters, D. (2017). Construction of a Species-Level Tree of Life for the Insects and  
750 Utility in Taxonomic Profiling. *Systematic Biology*, 66, 426–439  
751 <https://10.1093/sysbio/syw099>
- 752 Dupuis, J. R., Roe, A. D. & Sperling, F. A. H. (2012). Multi-locus species delimitation in  
753 closely related animals and fungi: one marker is not enough. *Molecular Ecology*,  
754 21, 4422–4436. <https://doi.org/10.1111/j.1365-294X.2012.05642.x>
- 755 Eberle, J., Ahrens, A., Mayer, C., Niehuis, O. & Misof, B. (2020). Plea for Standardized  
756 Nuclear Markers in Metazoan DNA Taxonomy. *Trends in Ecology & Evolution*, 35,  
757 336–345. <https://doi.org/10.1016/j.tree.2019.12.003>
- 758 Edwards, S. V. (2009). Is a new and general theory of molecular systematics emerging?  
759 *Evolution*, 63, 1–19. <https://doi.org/10.1111/j.1558-5646.2008.00549.x>
- 760 Erfan, S. & Mirarab, S. (2016). Fast coalescent-based computation of local branch  
761 support from quartet frequencies. *Molecular Biology & Evolution*, 33, 1654–1668.  
762 <https://doi.org/10.1093/molbev/msw079>
- 763 Fu, L., Niu, B., Zhu, Z., Wu, S. & Li, W. (2012) CD-HIT: accelerated for clustering the next  
764 generation sequencing data. *Bioinformatics*, 28, 3150–3152.  
765 <https://doi.org/10.1093/bioinformatics/bts565>.
- 766 Gauthier, J., Pajkovic, M., Neuenschwander, S., Kaila, L., Schmid, S., Orlando, L. &  
767 Alvarez, N. (2020). Museomics identifies genetic erosion in two butterfly species  
768 across the 20th century in Finland. *Molecular Ecology Resources*, 20, 1191–1205.  
769 <https://doi.org/10.1111/1755-0998.13167>
- 770 Godfray H. C. J. & Knapp S. (2004). Taxonomy for the twenty- first century. Introduction.  
771 *Philosophical Transactions of the Royal Society London B*, 359, 559–569.  
772 <https://doi.org/10.1098/rstb.2003.1457>
- 773 Gutierrez E. E. & Helgen K. M. (2013). Outdated taxonomy blocks conservation. *Nature*,  
774 495, 314. <https://doi.org/10.1038/495314e>

- 775 Hall, R. (2011). Australia-SE Asia collision: plate tectonics and crustal flow. In: Hall, R.,  
776 Cottam, M. A. & Wilson, M. E. J., editors. The SE Asian Gateway: History and  
777 Tectonics of the Australia-Asia Collision. *Geological Society Special Publications*,  
778 355, 75–109.
- 779 Hallmann, C. A., Sorg, M., Jongejans, E., Siepel, H., Hofland, N., Schwan, H., ... Goulson,  
780 D. (2017). More than 75 percent decline over 27 years in total flying insect  
781 biomass in protected areas. *PLoS One*, 12, e0185809.
- 782 Hajibabaei, M., Singer, G. A. C., Hebert, P. D. N. & Hickey, D. A. (2007). DNA barcoding:  
783 how it complements taxonomy, molecular phylogenetics and population genetics.  
784 *Trends in Genetics*, 23, 167-172. <https://doi.org/10.1016/j.tig.2007.02.001>
- 785 Hebert, P. D. N. Cywinska, A., Ball, S. L. & deWaard J. R. (2003). Biological  
786 identifications through DNA barcodes. *Proceedings of the Royal Society B –*  
787 *Biological Sciences*, 270, 313–321. <https://doi.org/10.1098/rspb.2002.2218>
- 788 Hoang, D. T., Chernomor, O., Haeseler A. von, Minh B. Q. & Vinh L. S. (2017). UFBoot2:  
789 Improving the ultrafast bootstrap approximation. *Molecular Biology & Evolution*,  
790 35, 518–522. <https://doi.org/10.1093/molbev/msx281>
- 791 Holt, B. G., Lessard, J.-P., Borregaard, M. K., Fritz, S. A., Araújo, M. B., ... Rahbek, C.  
792 (2013). An Update of Wallace's Zoogeographic Regions of the World. *Science*,  
793 339, 74–78. <https://doi.org/10.1126/science.1228282>
- 794 Jaskula, R., Kolanowska, M., Michalski, M. & Schwerk, A. (2021). From Phenology and  
795 Habitat Preferences to Climate Change: Importance of Citizen Science in Studying  
796 Insect Ecology in the Continental Scale with American Red Flat Bark Beetle,  
797 *Cucujus clavipes*, as a Model Species. *Insects*, 12, 369.  
798 <https://doi.org/10.3390/insects12040369>
- 799 Jiruskova, A., Motyka, M., Bocek, M. & Bocak, L. (2019). The Malacca Strait separates  
800 distinct faunas of poorly-flying *Cautires* net-winged beetles. *PeerJ*, 7, e6511.  
801 <https://doi.org/10.7717/peerj.6511>
- 802 Jordal, B. H. (2015). Molecular phylogeny and biogeography of the weevil subfamily  
803 Platypodinae reveals evolutionarily conserved range patterns. *Molecular*  
804 *Phylogenetics & Evolution*, 92, 294–307.  
805 <https://doi.org/10.1016/j.ympev.2015.05.028>
- 806 Junier, T. & Zdobnov, E. M. (2010). The Newick utilities: high-throughput phylogenetic  
807 tree processing in the UNIX shell. *Bioinformatics*, 26, 1669–1670.  
808 <https://doi.org/10.1093/bioinformatics/btq243>
- 809 Katoh, K. & Standley, D. M. (2013). MAFFT multiple sequence alignment software version  
810 7: improvements in performance and usability. *Molecular Biology & Evolution*, 30,  
811 772–780. <https://doi.org/10.1093/molbev/mst010>

- 812 Klink, R. van, Bowler, D. E., Gongalsky, K. B., Swenge, A. B., Gentile, A., Chase, J. M.  
813 (2020). Meta-analysis reveals declines in terrestrial but increases in freshwater  
814 insect abundances. *Science*, 368, 417–420.  
815 <https://doi.org/10.1126/science.aax9931>
- 816 Krehenwinkel, H., Pomerantz, A., Henderson, J. B.; Kennedy, S. R., Lim, J. Y., Swamy,  
817 V., Shoobridge, J. D., Graham, N., Patel, N. H., Gillespie, R. G. & Prost, S. (2019).  
818 Nanopore sequencing of long ribosomal DNA amplicons enables portable and  
819 simple biodiversity assessments with high phylogenetic resolution across broad  
820 taxonomic scale. *Gigascience*, 8, giz006.  
821 <https://doi.org/10.1093/gigascience/giz006>
- 822 Kück, P. & Longo, G. C. (2014). FASconCAT-G: extensive functions for multiple  
823 sequence alignment preparations concerning phylogenetic studies. *Frontiers in*  
824 *Zoology*, 11, 81. <https://doi.org/10.1186/s12983-014-0081-x>
- 825 Kück, P., Meusemann, K., Dambach, J., Thormann, B., von Reumont, B.M., ... Misof, B.  
826 (2010). Parametric and non-parametric masking of randomness in sequence  
827 alignments can be improved and leads to better resolved trees. *Frontiers in*  
828 *Zoology*, 7, 10. <https://doi.org/10.1186/1742-9994-7-10>
- 829 Kück, P. & Struck, T. H. (2014). BaCoCa – a heuristic software tool for the parallel  
830 assessment of sequence biases in hundreds of gene and taxon partitions.  
831 *Molecular Phylogenetics & Evolution*, 70, 94–98.  
832 <https://doi.org/10.1016/j.ympev.2013.09.011>
- 833 Kunte, K. (2008). Mimetic butterflies support Wallace’s model of sexual dimorphism.  
834 *Proceedings of the Royal Society B – Biological Sciences*, 275, 1617–1624.  
835 <https://doi.org/10.1098/rspb.2008.0171>
- 836 Kusy, D., Motyka, M., Bocek, M., Masek, M. & Bocak L. (2019). Phylogenomic analysis  
837 resolves the relationships among net-winged beetles (Coleoptera: Lycidae) and  
838 reveals the parallel evolution of morphological traits. *Systematic Entomology*, 44,  
839 911–925. <https://doi.org/10.1111/syen.12363>
- 840 Lanfear, R., Frandsen, P. B., Wright, A. M., Senfeld, T. & Calcott, B. (2017).  
841 PartitionFinder 2: new methods for selecting partitioned models of evolution for  
842 molecular and morphological phylogenetic analyses. *Molecular Biology &*  
843 *Evolution*, 34, 772–773. <https://doi.org/10.1093/molbev/msw260>
- 844 Letsch, H., Balke, M., Toussaint, E. F. A., Narakusumo, R. P., Fiedler, K. & Riedel, A.  
845 (2020). Transgressing Wallace’s Line brings hyperdiverse weevils down to earth.  
846 *Ecography*, 43, 1329–1340. <https://doi.org/10.1111/ecog.05128>

- 847 Linard, B., Arribas, P., Andújar, C., Crampton-Platt, A., Vogler, A. P. (2016). Lessons from  
848 genome skimming of arthropod-preserving ethanol. *Molecular Ecology Resources*,  
849 16, 1365–1377. <https://doi.org/10.1111/1755-0998.12539>
- 850 MacPhail, V. J. & Colla, S. R. (2020) Power of the people: A review of citizen science  
851 programs for conservation. *Biological Conservation*, 249, 108739.  
852 <https://doi.org/10.1016/j.biocon.2020.108739>
- 853 Mastretta-Yanes, A. Xue, AT., Moreno-Letelier, A., Jorgensen, T. H., Alvarez, N., Pinero,  
854 D. & Emerson, B. C. (2018). Long-term in situ persistence of biodiversity in tropical  
855 sky islands revealed by landscape genomics. *Molecular Ecology*, 27, 432–448.  
856 <https://doi.org/10.1111/mec.14461>
- 857 McMahon, D. P. & Hayward, A. (2016). Why grow up? A perspective on insect strategies  
858 to avoid metamorphosis. *Ecological Entomology*, 41, 505–515.  
859 <https://doi.org/10.1111/een.12313>
- 860 McKenna, D. D., Shin, S., Ahrens, D., Balke, M., Beza-Beza, C., ... Beutel, R. G. (2019).  
861 The evolution and genomic basis of beetle diversity. *Proceedings of the National*  
862 *Academy of Sciences of the United States of America*, 116, 24729–24737.  
863 <https://doi.org/10.1073/pnas.1909655116>
- 864 Merckx, V. S. F. T *et al.* (2015). Evolution of endemism on a young tropical mountain.  
865 *Science*, 524, 347–350. <https://doi.org/10.1038/nature1494>
- 866 Minh, B. Q., Schmidt, H. A., Chernomor, O., Schrempf, D., Woodhams, M. D., ... Lanfear,  
867 R. (2020). IQ-TREE 2: new models and efficient methods for phylogenetic  
868 inference in the genomic era. *Molecular Biology & Evolution*, 37, 1530–1534.  
869 <https://doi.org/10.1093/molbev/msaa015>
- 870 Misof, B., Meyer, B., von Reumont, B. M., Kück, P., Misof, K. & Meusemann, K. (2013).  
871 Selecting informative subsets of sparse supermatrices increases the chance to  
872 find correct trees. *BMC Bioinformatics*, 14, 348. [https://doi.org/10.1186/1471-](https://doi.org/10.1186/1471-2105-14-348)  
873 [2105-14-348](https://doi.org/10.1186/1471-2105-14-348)
- 874 Monaghan, M. T., Wild, R., Elliot, M., Fujisawa, T., Balke, M., Inward, D. J., Lees, D. C.,  
875 Ranaivosolo, R., Eggleton, P., Barraclough, T. G. & Vogler, A. P. (2009).  
876 Accelerated Species Inventory on Madagascar Using Coalescent-Based Models  
877 of Species Delineation. *Systematic Biology*, 58, 298–311.  
878 <https://doi.org/10.1093/sysbio/syp027>
- 879 Mora, C., Tittensor, D. P., Adl, S., Simpson, A. G. B. & Worm, B. (2011). How many  
880 species are there on Earth and in the ocean? *PLoS Biology*, 9, e1001127.  
881 <https://doi.org/10.1371/journal.pbio.1001127>
- 882 Morrison, W. R., Lohra, J. L., Duchon, P., Wilches R., Trujillo D., ... Renner S. S. (2009).  
883 The impact of taxonomic change on conservation: Does it kill, can it save, or is it

- 884 just irrelevant? *Biological Conservation*, 142, 3201–3206.  
885 <https://doi.org/10.1016/j.biocon.2009.07.019>
- 886 Motyka, M., Kampova, L. & Bocak, L. (2018). Phylogeny and evolution of Müllerian  
887 mimicry in aposematic *Dilophotes*: evidence for advergence and size-constraints  
888 in evolution of mimetic sexual dimorphism. *Scientific Reports*, 8, 3744.  
889 <https://doi.org/10.1038/s41598-018-22155-6>
- 890 Motyka, M., Bocek, M., Kusy, D., Bocak, L. (2020). Interactions in multi-pattern Mullerian  
891 communities support origins of new patterns, false structures, imperfect  
892 resemblance and mimetic sexual dimorphism *Scientific Reports*, 10, 11193.  
893 <https://doi.org/10.1038/s41598-020-68027-w>
- 894 Motyka, M., Kusy, D., Masek, M., Bocek, M., Li, Y., Bilkova, R., ... Bocak, L. (2021).  
895 Conspicuousness, phylogenetic structure, and origins of Müllerian mimicry in 4000  
896 lycid beetles from all zoogeographic regions. *Scientific Reports*, 11, 5961.  
897 <https://doi.org/10.1038/s41598-021-85567-x>
- 898 Myers, N., Mittermeier, R. A., Mittermeier, C. G., da Fonseca G. A. B. & Kent J. (2000).  
899 Biodiversity hotspots for conservation priorities. *Nature*, 403, 853–858.  
900 <https://doi.org/10.1038/35002501>
- 901 Naser-Khdour, S., Minh, B. Q., Zhang, W., Stone, S. A. & Lanfear, R. (2019). The  
902 prevalence and impact of model violations in phylogenetic analysis. *Genome*  
903 *Biology & Evolution*, 11, 3341–3352. <https://doi.org/10.1093/gbe/evz193>
- 904 Novotny, V., Drozd, P., Miller, S. E., Kulfan, M., Janda, M., Basset, Y., Weiblen, G. D.  
905 (2006). Why are there so many species of herbivorous insects in tropical  
906 rainforests? *Science*, 313, 1115–1118. <https://doi.org/10.1126/science.1129237>
- 907 Petersen, M., Meusemann, K., Donath, A., Dowling, D., Liu, S., ... Niehuis, O. (2017).  
908 Orthograph: a versatile tool for mapping coding nucleotide sequences to clusters  
909 of orthologous genes. *BMC Bioinformatics*, 18, 111.  
910 <https://doi.org/10.1186/s12859-017-1529-8>
- 911 Prathapan, K. D. *et al.* (2018). When the cure kills-CBD limits biodiversity research  
912 National laws fearing biopiracy squelch taxonomy studies. *Science*, 360, 1405–  
913 1406. <https://doi.org/10.1126/science.aat9844>
- 914 Revell, L. J. (2012). phytools: An R package for phylogenetic comparative biology (and  
915 other things). *Methods in Ecology & Evolution*, 3, 217–223.  
916 <https://doi.org/10.1111/j.2041-210X.2011.00169.x>
- 917 Riedel, A., Sagata, K., Suhardjono, Y. R., Tänzler, R. & Balke, M. (2013). Integrative  
918 taxonomy on the fast track-towards more sustainability in biodiversity research.  
919 *Frontiers in Zoology*, 10, 15. <https://doi.org/10.1186/1742-9994-10-15>



- 920 Sangster, G., Luksenburg, J. A. (2014). Declining rates of species described per  
921 taxonomist: slowdown of progress or a side-effect of improved quality in  
922 taxonomy? *Systematic Biology*, *64*, 144–151.  
923 <https://doi.org/10.1093/sysbio/syu069>
- 924 Schliep, K. P. (2011). phangorn: phylogenetic analysis in R. *Bioinformatics*, *27*, 592–593.  
925 <https://doi.org/10.1093/bioinformatics/btq706>
- 926 Sharkey, M. J., Janzen, D. H., Hallwachs, W., ... Burns J. M. (2021). Minimalist revision  
927 and description of 403 new species in 11 subfamilies of Costa Rican braconid  
928 parasitoid wasps, including host records for 219 species. *Zookeys*, *1013*, 1–665.  
929 <https://doi.org/10.3897/zookeys.1013.55600>
- 930 Sklenarova, K., Chesters, D. & Bocak L. (2013). Phylogeography of poorly dispersing net-  
931 winged beetles: a role of drifting India in the origin of Afrotropical and Oriental  
932 fauna. *PLoS One*, *8*(6), e67957. <https://doi.org/10.1371/journal.pone.0067957>
- 933 Sodhi, N. S., Koh, L. P., Brook, B. W. & Ng P. K. L. (2004). Southeast Asian biodiversity:  
934 an impending disaster. *Trend in Ecology & Evolution*, *19*, 654–660.  
935 <https://doi.org/10.1016/j.tree.2004.09.006>
- 936 Srivathsan, A., Hartop, E., Puniamoorthy, J., Lee, W. T., Kutty, S. N., ... Meier, R. (2019).  
937 Rapid, large-scale species discovery in hyperdiverse taxa using 1D MinION  
938 sequencing. *BMC Biology*, *17*, 96. <https://doi.org/10.1186/s12915-019-0706-9>
- 939 Stanke, M. & Waack, S. (2003). Gene prediction with a hidden Markov model and a new  
940 intron submodel. *Bioinformatics*, *19*, 215–225.  
941 <https://doi.org/10.1093/bioinformatics/btg1080>
- 942 Strimmer, K. & von Haeseler, A. (1997). Likelihood-mapping: a simple method to visualize  
943 phylogenetic content of a sequence alignment. *Proceedings of the National  
944 Academy of Sciences of the United States of America*, *94*, 6815–6819.  
945 <https://doi.org/10.1073/pnas.94.13.6815>
- 946 Tautz, D., Arctander, P., Minelli, A., Thomas, R. H., Vogler, A. P. (2003). A plea for DNA  
947 taxonomy. *Trends in Ecology & Evolution*, *18*, 70–74.  
948 [https://doi.org/10.1016/S0169-5347\(02\)00041-1](https://doi.org/10.1016/S0169-5347(02)00041-1)
- 949 Theng, M., Jusoh, W. F. A., Jain, A., Huertas, B., Tan, D. J. X., Tan, H. Z., Kristensen, N.  
950 P., Meier, R., Chisholm, R. A. (2020). A comprehensive assessment of diversity  
951 loss in a well-documented tropical insect fauna: Almost half of Singapore's  
952 butterfly species extirpated in 160 years. *Biological Conservation*, *242*, 108401.  
953 <https://doi.org/10.1016/j.biocon.2019.108401>
- 954 Thomson, S. A., Pyle, R. L., Ahyong, S. T., Alonso-Zarazaga, M., Ammirati, J., ... Zhou,  
955 H.-Z. (2018). Taxonomy based on science is necessary for global conservation.  
956 *PLoS Biology*, *16*, 1–12. <https://doi.org/10.1371/journal.pbio.2005075>

- 957 Toussaint, E. F. A., Hall, R., Monaghan, M. T., Sagata, K., Ibalim, S., ... Balke, M. (2014).  
958 The towering orogeny of New Guinea as a trigger for arthropod megadiversity.  
959 *Nature Communications*, 5, 4001. <https://doi.org/10.1038/ncomms5001>
- 960 Vasilikopoulos, A., Balke, M., Beutel, R.G., Donath A., Podsiadlowski, ... Misof, B. (2019).  
961 Phylogenomics of the superfamily Dytiscoidea (Coleoptera: Adephaga) with an  
962 evaluation of phylogenetic conflict and systematic error. *Molecular Phylogenetics*  
963 *& Evolution*, 135, 270–285. [10.1016/j.ympev.2019.02.022](https://doi.org/10.1016/j.ympev.2019.02.022)
- 964 Xie, Y., Wu, G., Tang, J., Luo, R., Patterson, J., ... Wang, J. (2014). Trans: de novo  
965 transcriptome assembly with short RNA-Seq reads. *Bioinformatics*, 30, 1660–  
966 1666. <https://doi.org/10.1093/bioinformatics/btu077>
- 967 Yeo, D., Srivathsan, A. & Meier, R. (2020). Longer is not always better: optimizing  
968 barcode length for large-scale species discovery and identification. *Systematic*  
969 *Biology*, 69, 999–1015. <https://doi.org/10.1093/sysbio/syaa014>
- 970 Zdobnov, E. M., Tegenfeldt, F., Kuznetsov, D., Waterhouse, R. M., Simão F. A., ...  
971 Kriventseva, E. V. (2016). OrthoDBv9.1: cataloging evolutionary and functional  
972 annotations for animal, fungal, plant, archaeal, bacterial and viral orthologs.  
973 *Nucleic Acids Research*, 45, D744–D749. <https://doi.org/10.1093/nar/gkw1119>
- 974 Zhang, C., Rabiee, M., Sayyari, E. & Mirarab, S. (2018). ASTRAL-III: Polynomial time  
975 species tree reconstruction from partially resolved gene trees. *BMC*  
976 *Bioinformatics*, 19(S6), 153. <https://doi.org/10.1186/s12859-018-2129-y>
